# Supplementary material
Source: Springer Nature journal article supplement (https://www.springermedizin.de/resource/supplementary/12890_2012_404_MOESM14_ESM.pdf/9505132)

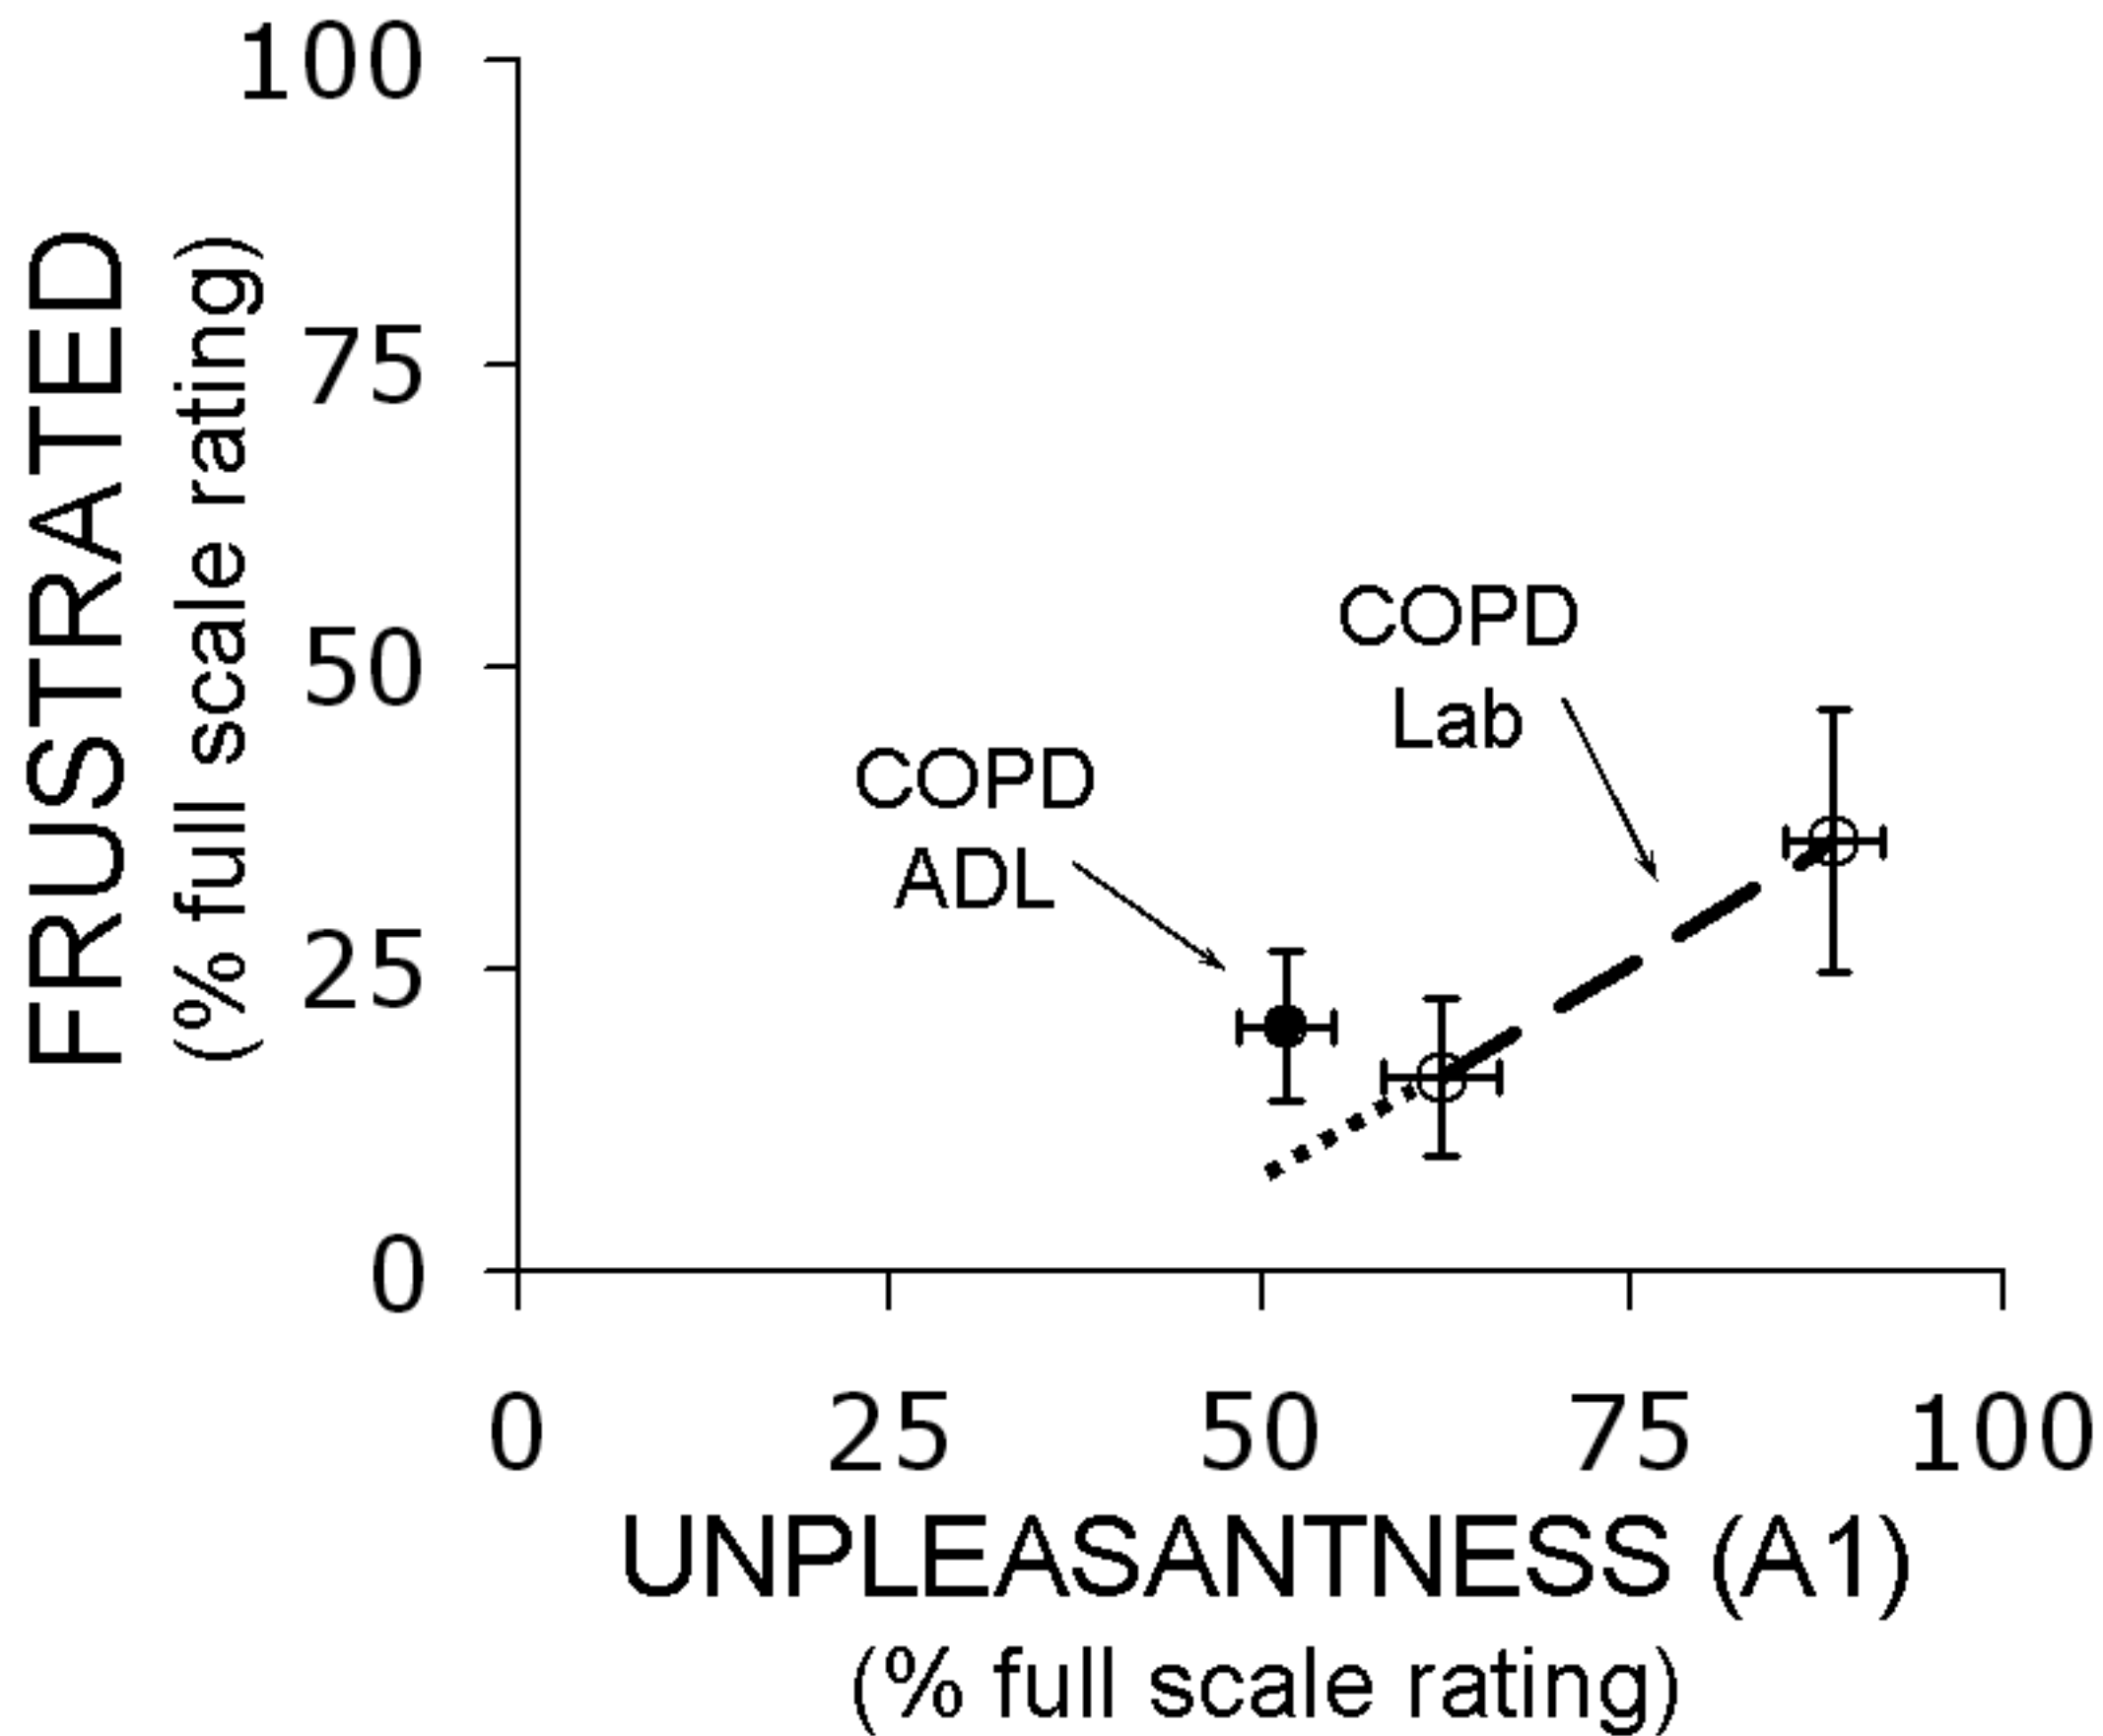

Supplement: MOESM14 [file 9505132]
